1 **Comprehensive Comparative Genomic reveals: *Bacteroides fragilis* is a reservoir of antibiotic**  
2 **resistance genes in the gut microbiota**

3  
4 **Short Title: *Bacteroides fragilis* is a reservoir of antibiotic resistance genes**

5  
6 Eliane Evanovich<sup>1</sup>, Patricia Jeanne de Souza Mendonça Mattos<sup>1</sup>, João Farias Guerreiro<sup>1</sup>

8 Filiation:

9 \*Laboratório de Genética Humana e Médica, Instituto de Ciências Biológicas - Universidade  
10 Federal do Pará, Pará, Brasil.

11  
12 E-mail address for correspondence: [lianevanovich@gmail.com](mailto:lianevanovich@gmail.com)

13 Co-authors e-mail addresses: [patjeanne@gmail.com](mailto:patjeanne@gmail.com), [joao.guerreiro53@gmail.com](mailto:joao.guerreiro53@gmail.com)

14  
15 Mailing address: Laboratório de Genética Humana e Médica - Universidade Federal do Pará, Rua  
16 Augusto Corrêa, 1 - Guamá, Belém - PA, 66075-110.

17  
18 ORCID ID: <https://orcid.org/0000-0001-7076-5621>

19  
20  
21  
22  
23  
24  
25  
26  
27

28 **Abstract**

29 *Bacteroides fragilis* are commensal bacteria of the gut microbiota of mammals and may cause  
30 severe infection in a susceptible host. Treatment can be cumbersome if multidrug resistant strains  
31 are present in the affected tissue. The principal aim of this study was to provide new insights into  
32 the genomic properties of *B. fragilis* through different approaches in comparative genomics. Results  
33 revealed that the pan-genome is opened, and an intense exchange of genetic material reinforces this  
34 inference. The Don complex, responsible for extraintestinal adaptation, is present in all strains,  
35 suggesting a crucial role for *B. fragilis* adaptation. CRISPR-Cas system is at 76% of the samples,  
36 but it apparently has low accuracy against prophage. Multidrug resistance genes are in 80% of  
37 strains. Conjugative transposons and integrative and conjugative elements (ICE) are the main  
38 spreaders of genes for antimicrobial resistance. We also reported evidence for horizontal gene  
39 transfer (HGT) of antimicrobial resistance genes among the *B. fragilis* strains and Bacteroidales. At  
40 least 398 genes are under positive selection, including genes for antimicrobial resistance and  
41 transport of toxins and nutrients.

42

43 **Keywords:** *Bacteroides fragilis*, Comparative genomics, Genes for antimicrobial resistance,  
44 Horizontal gene transfer.

45

46

47

48

49

50

51

52

53

54

55

56

57

58

## 59 **1. Introduction**

60 *Bacteroides fragilis* is an obligatory anaerobic Gram-negative bacillus. It is usually commensal in  
61 mammals and is critical for immune development and intestinal mucosal integrity [1, 2, 3]. It may  
62 become pathogenic in a vulnerable host, being able to invade intra- and extra-abdominal tissues,  
63 including blood [4–9]. Recent evidence suggests that enterotoxigenic *B. fragilis* (ETBF) is  
64 associated with colorectal cancer development [8-11].

65 ETBF can produce fragilysin (known as BFT), an endotoxin from the zinc-dependent  
66 metalloproteinase family that cleaves E-cadherin in colonocytes [12-16]. The interaction between  
67 BFT and intestinal epithelial cells triggers an inflammatory response that increases apoptosis and  
68 favors extraintestinal invasion [17]. The *bftP* gene encodes the BFT and has three alleles: *bftP-1*,  
69 *bftP-2*, and *bftP-3* [18]. It is on a pathogenic island termed BfPAI, along with genes for a  
70 hypothetical protein and metalloproteinase II (*mpII*) [13, 14, 18–21]. BfPAI of some ETBFs is in  
71 the CTn86 transposon [13-14].

72 Antimicrobial multidrug resistance (AMR) genes are widespread among the *B. fragilis* strains and  
73 hamper antimicrobial therapy [22]. Integrative and conjugative elements (ICE) disseminate AMR  
74 genes because they can mobilize plasmids, genomic islands, and other non-conjugative elements  
75 [23]. In addition, their genes encode proteins for excision, conjugation (type IV secretion system-  
76 T4SS), and transferring DNA sequences [24].

77 Other genes that improve *B. fragilis* adaptation to intestinal and extraintestinal environments belong  
78 to Type VI secretion system (T6SS), capsular lipopolysaccharide biosynthesis locus (LPS locus),  
79 and Don PUL complex. T6SS is a protein complex that acts during competition, inhibiting or killing  
80 other bacteria or eukaryotic cells [25-27]. The LPS locus has 19 orthologous genes (OG) that  
81 control the expression of three capsular polysaccharides (polysaccharides A, B, and C) and may  
82 trigger the formation of intra-abdominal abscesses [28–32]. Don PUL complex enables  
83 extraintestinal adaptation through uptake of N-linked glycans from fluids [33].

84 Despite the approaches described above, few studies have investigated the comparative genomics of  
85 *B. fragilis*. Thus, this study provides insights into the genomic properties of these bacteria. For this  
86 purpose, we analysed 183 strains by applying comparative genomics tools. Some insights obtained  
87 were 1) Most genes are related to metabolic processes, mainly carbohydrates and amino acids - a  
88 frequent pattern of bacterial gut microbiota; 2) The Don PUL is the only system common to all  
89 strains, suggesting that alternative resource capture is decisive for their survival in the gut

90 microbiota; and 3) We also reported evidence of HGT within order Bacteroidales. Hence, this  
91 research extends our knowledge of the genomic evolution of *B. fragilis*.

92

## 93 **2. Materials and Methods**

### 94 *Sample*

95 Samples used were available at the National Center for Biotechnology Information - NCBI  
96 (<https://www.ncbi.nlm.nih.gov/genome/browse/#!/prokaryotes/414/>). Genome lengths range from  
97 4.87 to 7.60 megabases (complete, scaffold, and contig), and the minimal coverage was 15X [34]  
98 The strains used and their sources are in S1 Table.

99

### 100 *Pan-genome Analysis*

101 Bacterial Pan Genome Analysis tool version 1.3 (BPGA) was used to identify core, accessory, and  
102 unique genomes [35]. Gene functions were based on Clusters of Orthologous Groups of proteins  
103 (COG) and the Kyoto Encyclopedia of Genes and Genomes (KEGG). Orthologous cluster analysis  
104 (default setting) was performed by Usearch9.2.64 [36] under a cut-off value of 95% to generate  
105 high-quality clusters [37]. Multiple sequence comparison by log-expectation (MUSCLE) was used  
106 to generate alignments and phylogenies [36]. Gnuplot 5.0 was used for plotting graphs [38].

107

### 108 *Prediction of CRISPR and Resistance genes*

109 CRISPR-Cas sequences were estimated by CRISPRRCasFinder ([https://crisprcas.i2bc.paris-](https://crisprcas.i2bc.paris-saclay.fr/CrisprCasFinder/Index)  
110 [saclay.fr/CrisprCasFinder/Index](https://crisprcas.i2bc.paris-saclay.fr/CrisprCasFinder/Index)) [39]. Antimicrobial resistance genes were obtained from CARD  
111 (Comprehensive Antibiotic Resistance Database) (<http://arpcard.mcmaster.ca/>). CARD was  
112 performed under the Resistance Gene Identifier option - RGI (Perfect match equal to 100) [40].  
113 Results with a 'strict match' between 95.0 and 99.9 were also analyzed under the Basic Local  
114 Alignment Search Tool- BLAST, as suggested by Jia et al. [40].

115

### 116 *Prediction of Mobilome*

117 PhiSpy software was used to predict putative prophages, and ICEFinder was performed to identify  
118 ICE and IME (Integrative mobilizable elements) [41-42]. These analyses were restricted to 19  
119 complete genomes because the prophage, ICE, and IME regions are usually long and would be cut  
120 into short sequences, such as contigs and scaffolds.

121 Candidate proteins were searched against the CARD (BLASTp) [43], Virulence factor database  
122 (VFDB) [[http://www.mgc.ac.cn/VFs/search\\_VFs.htm](http://www.mgc.ac.cn/VFs/search_VFs.htm); blastp/Protein sequences from VFDB full  
123 dataset (setB)] [44], and NCBI server (BLASTp) (<https://blast.ncbi.nlm.nih.gov/>) [45]. The score  
124 values significant were bit-score equal to or higher than 50; E-value  $\leq 0.0$ , and an identity equal or  
125 higher than 30% [46]. Mauve under ProgressiveMauve (default setting) [47–48] was used to  
126 compare syntenic regions. MobileElementFinder (V1.0.3)  
127 (<https://cge.cbs.dtu.dk/services/MobileElementFinder/>) was performed to predict mobile genetic  
128 elements (MGEs) associated with antibiotic and virulence factors (Minimum alignment coverage =  
129 95; minimum sequence identity-90%, maximum truncation-30 bp) [49–50].

130

### 131 *Analysis of Molecular Evolution*

132 Genetic Algorithm Recombination Detection (GARD) was used to detect recombination. Random  
133 effect likelihood (FEL), Fast Unconstrained Bayesian Approximation (FUBAR), and Single-  
134 likelihood ancestor counting (SLAC) methods implemented by HyPhy 2.5 under the MG94xREV  
135 codon model were used to identify sites under positive selection [50–55]. Evidence of episodic  
136 positive selection was verified by the mixed-effects model of evolution (MEME) and Branch-site  
137 unrestricted statistical test for episodic diversification (BUSTED). The score values were significant  
138 whether it is less than or equal to 0.05 (BUSTED, SLAC, FEL, and MEME models), and for the  
139 posterior probability if it is  $\geq 95\%$  (FUBAR).

140

## 141 **3. Results and Discussions**

### 142 *3.1 Pan-genome*

143 Pan-genome is opened and has about 4232 protein-coding genes, 814 of which belong to the core  
144 genome, 3455 are in the set of accessory genomes, and 37 are in the unique genome, on average.  
145 Most of which are related to the metabolism of carbohydrates and amino acids (KEGG). Zou et al.  
146 [57] described the same pattern in other bacteria of the gut microbiota. According to COG  
147 distribution, most of the genes of the flexible gene pool (accessory and unique) are in the  
148 ‘Information storage and processing’ category [Translation, ribosomal structure and biogenesis (J);  
149 RNA processing and modification (A); Transcription (K); Replication, recombination and repair  
150 (L); Chromatin structure and dynamics (B)]. Analysis of USEARCH results indicated that many  
151 flexible genes encode truncated proteins. These genes might have been acquired through HGT  
152 because they are often are in mobile element regions.

153 Orthologous genes distributed in their COG and KEGG general categories are in Additional files,  
154 S1 Fig. COG distribution in specific categories is in S2 Fig.

155

156 **Fig 1. Distribution of orthologous genes into KEGG categories.** (a) Frequency of core (in blue),  
157 accessory (in red), and unique (green) genes. The arrows point to the table corresponding to the  
158 graph bars. (c) Table showing the genes supposedly related to infectious diseases and their features.

159

160 KEGG analysis also displayed genes potentially related to human infections, mainly in the flexible  
161 genome. These genes often encode proteins with bacterial metabolic functions but may be related to  
162 virulence in specific bacteria. For example, the molecular chaperone DnaK protein, encoded by the  
163 *dnaK* gene, contributes to stress tolerance and cell growth, but it is also a virulence factor in  
164 *Mycobacterium tuberculosis* [58–61]. Fig 1 indicates the distribution of pan-genome across KEGG  
165 categories and a table that highlights genes associated with infectious diseases.

166 Don PUL operon is in all strains, in this way belongs to the core genome. It encodes proteins that  
167 enable the deglycosylate N-linked glycans of the gut mucus layer, transferrin, and other  
168 glycoproteins [33]. Therefore, the operon is essential for *B. fragilis* adaptation to intra- and extra-  
169 intestinal environments. Other genes related to adaptation and virulence are in the accessory  
170 genome, such as *bftP*, perforin, LPS locus, and *T6SS* genes.

171 Forty strains have *bftP-1* allele while *bftP-2* is in eight strains (20793-3, 2-078382-3, 86-5443-2-2,  
172 BOB25, CL07T00C01, CL07T12C05, CM13 and DS71). No strain has *bftP-3*. BfPAI is absent in  
173 47 strains described as ETBF [62], suggesting that it was not sequenced or annotated in these  
174 strains. Pan-genome prediction and the genomic location of BfPAI are in S2 Table.

175 The perforin gene is in 80 strains, both ETBFs and NTBFs (non-enterotoxigenic *B. fragilis*). The  
176 gene encodes a nonfunctional protein in five strains (1007-1-F #8, 3783N1-2, 3783N2-1, 3976T7,  
177 and S13 L11) because of the absence of 139 amino acids from the terminal portion of the protein,  
178 which includes the MACPF domain (YGTHVLTDITLGG)- critical for protein activity [61].

179 Perforin [membrane attack complex/perforin (MACPF) domain] is a bacteriocin that can rupture the  
180 plasma membrane of a cell host and might be a virulence factor [63]. It is found mainly in  
181 eukaryotes and some bacteria, including *Bacteroides spp.* [64].

182 LPS locus was described in 638R and NCTC9343 strains [31]. We also reported it in thirteen strains  
183 [DCMOUH0042B, 3719 A10, 3986 N3, 3986 T (B) 13, 3986 T (B) 9, AD126T\_1B, AD126T\_2B,  
184 ATCC 25285, BFR\_KZ09, CL04T03C20, HMW 615, KLE1257, and KLET1758]. Most of them

185 were isolated from extraintestinal infections (abscess, blood, or tissue). The capsular polysaccharide  
186 complex is one of the major virulence factors related to abscess formation [29, 31], and this might  
187 explain the source of the strains.

188

189 a)

190

191

192

193

194

195

196

197 b)

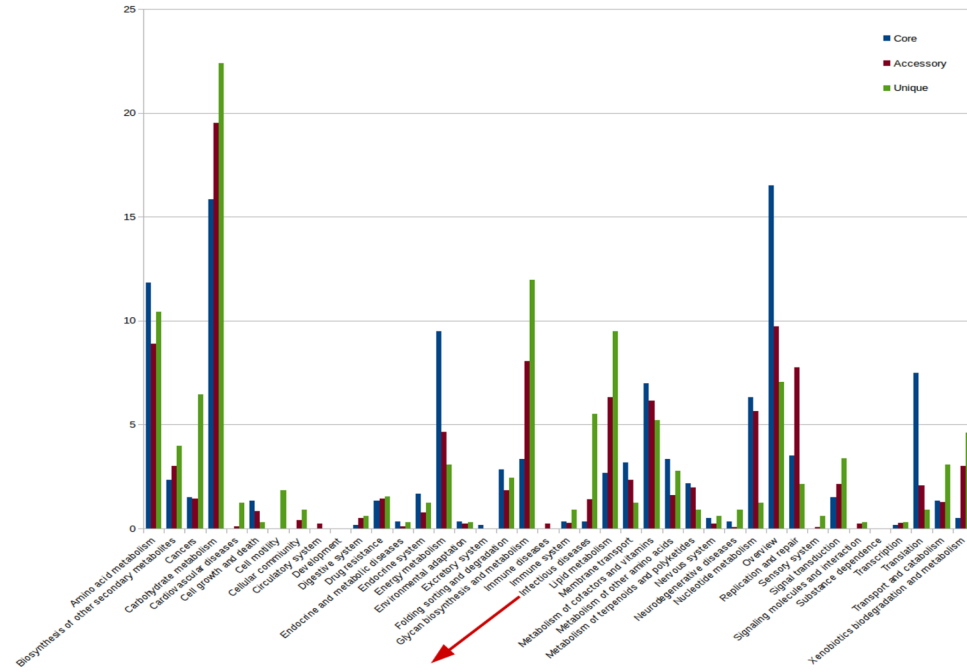

| Gene           | Definition                                       | Function                 | Description                                             | Pathogen                                                                                                    | Kegg   | Pathway | Genomes                | ID%  | Bit-score | E-value   |
|----------------|--------------------------------------------------|--------------------------|---------------------------------------------------------|-------------------------------------------------------------------------------------------------------------|--------|---------|------------------------|------|-----------|-----------|
| <i>InlA</i>    | Internalin/Ig-like domain                        | Adhesion                 | Bacterial invasion of epithelial cells                  | <i>Listeria monocytogenes</i>                                                                               | K13730 | ko05100 | 3725 D9 ii             | 47.9 | 49        | 2.21E-05  |
| <i>sdhA</i>    | Succinate dehydrogenase / Fumarate reductase     | Tricarboxylic acid cycle | Legionellosis                                           | <i>Legionella pneumophila</i><br><i>Legionella longbeachae</i>                                              | K00239 | ko05134 | Core genome            | 30   | 141       | 5.36E-33  |
| <i>rpoN</i>    | RNA polymerase sigma-54 factor                   | Biofilm formation        | <i>Vibrio cholerae</i> infection                        | <i>Vibrio cholerae</i>                                                                                      | K03092 | ko05111 | Accessory genome (178) | 92.5 | 905       | 5.32E-263 |
| <i>dltA</i>    | D-alanine--poly(phosphoribitol) ligase subunit 1 | Antimicrobial activity   | <i>Staphylococcus aureus</i> infection                  | <i>Staphylococcus aureus</i>                                                                                | K03367 | ko05150 | Accessory genome (178) | 31.3 | 199       | 1.55E-50  |
| <i>dnaK</i>    | Molecular chaperone DnaK                         | Stress response          | Tuberculosis bacterial                                  | <i>Mycobacterium tuberculosis</i>                                                                           | K04043 | ko05152 | Core genome            | 95.6 | 1193      | 0.0       |
| <i>ACTB_G1</i> | Actin beta/gamma 1                               | Actin polymerization     | Shigellosis                                             | <i>Shigella dysenteriae</i><br><i>Shigella flexneri</i><br><i>Shigella boydii</i><br><i>Shigella sonnei</i> | K05692 | ko05131 | AD135F_2B              | 92.5 | 905       | 5.32E-263 |
| <i>ACTB_G1</i> | Actin beta/gamma 1                               | Actin polymerization     | <i>Vibrio cholerae</i> infection                        | <i>Vibrio cholerae</i>                                                                                      | K05692 | ko05110 | AD135F_2B              | 97.6 | 258       | 5.34E-69  |
| <i>prtC</i>    | U32 family peptidase                             | Cell signaling           | Epithelial cell signaling in <i>H. pylori</i> infection | <i>Helicobacter pylori</i>                                                                                  | K08303 | ko05120 | 3725 D9 ii             | 95.1 | 815       | 6.27E-236 |
| <i>tolC</i>    | TolC family protein (BF_RS08835)                 | Secretion                | Pertussis                                               | <i>Bordetella pertussis</i>                                                                                 | K12340 | ko05133 | Core genome            | 80   | 728       | 8.55E-210 |

199 **Fig 1. Distribution of orthologous genes into KEGG categories.** (a) Frequency of core (in blue), accessory (in red), and unique (green) genes. The  
 200 arrows point to the table corresponding to the graph bars. (c) Table showing the genes supposedly related to infectious diseases and their features.



201 Fifteen complete genomes have GA3 T6SS genetic architecture [27], except the genomes of  
202 DCMOUH0067B, DCMSKEJBY0001B, FDAARGOS\_763, Q1F2 strains, which belong to the  
203 carbapenem-resistant *B. fragilis* group [63]. This finding suggests T6SS is nonessential to *B.*  
204 *fragilis*.

205

### 206 3.2 Prediction of CRISPR-Cas system

207 Results revealed that 76,4% of the genomes have a CRISPR-Cas system. Fifty-eight strains have  
208 two CRISPR-Cas types in their genomes. Three types are only in six strains (AF26-6, BFR\_KZ08,  
209 S14, S38L3, S38L5, and TM08-15). CRISPR-Cas system is absent in most NTBFs, whereas the  
210 IIIB type is the most common among ETBFs, corroborating Tajkarimi and Wexler [64].

211 Monophyletic groups often share the same CRISPR-Cas system. A phylogenetic tree displaying the  
212 CRISPR-Cas type of each strain is in S3 Fig.

213

### 214 3.3 Antimicrobial Resistance Genes

215 The most frequent antimicrobial resistance genes in *B. fragilis* are *cepA* [Class A beta-lactamase  
216 (EC:3.5.2.6)] and *tetQ* (Tetracycline-resistant ribosomal protection protein). Only 40 strains  
217 presented a ‘perfect match’ (100%) for *cepA*, but the results showed high identity values in 158  
218 strains (range from 98 to 99%, ARO: 3003559). Thus, the functionality of *cepA* gene is probable.

219 Thirty-six strains have the *tetQ* gene with a ‘perfect match’, and 125 strains presented a gene with a  
220 ‘strict match’ (ARO: 3000191), but likely functional, according to the comparison to the protein  
221 described by Lépine et al. [65]. *tetQ* is the most abundant gene for antimicrobials in the human gut  
222 microbiota, as reported in a metagenomics analysis [66]. Therefore, the spread of the gene seems  
223 advantageous.

224 *ermF* gene [23S rRNA (Adenine (2058)-N (6))-methyltransferase (EC: 2.1.1.-)] is in 43 strains with  
225 a ‘strict match’ (identity from 98 to 99.9%), but their binding sites - essential for protein  
226 functionality [67] are unchanged. This gene confers multidrug resistance (macrolide, lincosamide,  
227 and streptogramin B) [68] and has a clinical impact on treatment. Antimicrobial resistance genes  
228 present in the strains are in S3 Table.

229 *aadS* [Aminoglycoside 6-nucleotidyltransferase (EC: 2.7.1.95)], *aphA* [Aminoglycoside 3’-  
230 phosphotransferase (EC: 2.7.1.95)], *ccrA* [Subclass B1 beta-lactamase (EC 3.5.2.6)], *OXA-347*  
231 [Beta-lactamase class D OXA-209 (EC: 3.5.2.6)], *SUL2* [Dihydropteroate synthase type-2 (EC

232 2.5.1.15)], and *TEM-1* [Beta-lactamase class A TEM (EC: 3.5.2.6)] genes had 'perfect matches', but  
233 they were restricted to a few strains.

234

### 235 3.4 Mobilome

#### 236 a) Analysis of Prophages

237 Results indicated the complete genomes have two (BOB25 strain) to fifteen (DCMOUH0067B and  
238 FDAASGOS\_763 strains) prophage regions. Most virulence-related proteins in these regions had  
239 low scores, except for EF-Tu, which had higher values [VFDB database = VFG046475  
240 (F7308\_0636) Tu translation elongation factor (EF-Tu) (*Francisella sp.* TX077308) ID = 64%; bit-  
241 score = 540, and E-value = e-154]. EF-Tu protein performs various functions in bacteria, including  
242 catalyzing the binding of aminoacyl-tRNA to the ribosome, forming a biofilm, and decreasing the  
243 host immune response [69]. It is unclear whether it plays a role related to virulence in *B. fragilis*.  
244 We found no antimicrobial resistance genes in the prophage region (S4 Table).

245

#### 246 b) ICEFinder Analysis

247 The size of ICEs varies from 24.6 kilobase pairs (kb) to 193 kb, while EMIs are smaller (5 kb to  
248 76.8 kb). Genes for antimicrobial resistance, mainly *tetQ*, were identified in ICEs and IMEs.  
249 Complete genomes have at least one putative ICE with T4SS, except those from BE1 and Q1F2  
250 with only putative IMEs. S5 Table indicates the genomic location of the ICEs, IMEs and the  
251 antibiotic resistance genes found in them.

252 ICEFinder, Mauve, and NCBI BLAST search (Bit-score = 70088; e-value = 1.020e + 05; ID =  
253 98%) analyses supported the hypothesis of an HGT (horizontal gene transfer) event between the  
254 genomic regions of *B. fragilis* DCMOUH0085B (position 2993358 to 3044318) and one from  
255 *Butyricimonas faecalis* H184 (Accession no. CP032819.1). The two regions also share the genes for  
256 antimicrobial resistance, *AADE* (aminoglycoside 6-adenylyltransferase gene), *ermB* [rRNA adenine  
257 N-6-methyltransferase gene], (*APH (3') - IIIA* {ANT-like pseudogene (9) ANT-like  
258 aminoglycoside (9) aminoglycoside nucleotidyltransferase family gene}. HGT among Bacteroidales  
259 species was also reported by Coyne et al. [70] and García-Bayona et al. [71].

260 The results of the Mauve and ICEFinder analyses are in Fig 2 and Table 1.

261

262

263

264 **Fig 2. Insertion elements found in the strains.** Frequency of insertion elements inferred by  
 265 MobileElementFinder. The green bar corresponds to the insertion elements with an antimicrobial  
 266 resistance gene, the red bar denotes insertion elements without antimicrobial resistance gene, and  
 267 the gray bar shows the untransferred plasmid (repUS2).

268

269 **Table 1. Features of the insertion elements.**

| Strain                 | Accession Number | IS Type                      | IS Family | Position in Contigs | ID (%) |
|------------------------|------------------|------------------------------|-----------|---------------------|--------|
| <b>2_1_16</b>          | GG705215.1       | ISBthe1- <i>nimB</i>         | IS4       | 39206-40521         | 98.9   |
| <b>320_BFRA</b>        | JVLR01000059.1   | ISBf8 (Tn4555)- <i>cfxA</i>  | IS4       | 1-1663              | 99.7   |
| <b>885_BFRA</b>        | JUPJ01000031.1   | IS4351 (Tn4351)- <i>tetX</i> | IS30      | 2258-3424           | 99.9   |
| <b>894_BFRA</b>        | JUOZ01000029.1   | IS4351 (Tn4351)- <i>tetX</i> | IS30      | 2258-3424           | 99.9   |
| <b>915_BFRA</b>        | JUOA01000729.1   | IS4351 (Tn4351)- <i>tetX</i> | IS30      | 3147-3947           | 100    |
| <b>BF8 Consensus_4</b> | LGTH01000004.1   | IS4351 (Tn4351)- <i>tetX</i> | IS30      | 924279-925445       | 99.9   |
|                        | LGTH01000004.1   | IS4351 (Tn4351)- <i>ermF</i> | IS30      | 922085-923239       | 100    |
| <b>BF8 Consensus_1</b> | LGTH01000001.1   | IS1168- <i>nimB</i>          |           | 612426-612920       | 100    |
| <b>BF8 Consensus_2</b> | LGTH01000002.1   | IS942- <i>cfiA</i>           | IS4       | 1220392-1221141     | 99.1   |
| <b>CL07T00C01</b>      | AGXM01000001.1   | IS4351 (Tn4351)- <i>ermF</i> | IS30      | 582395-583195       | 100    |

270

271 A genomic region from the CL03T12C07 strain (position 3350878 to 3378618) is a putative ICE  
 272 with T4SS that includes a CtnDOT but its *ermF* gene is unfunctional. CtnDOT is a transposon  
 273 widespread among *Bacteroides spp.* and contains the genes for antimicrobial resistance, *ermF*, *tetQ*,  
 274 *tetX* (flavin-dependent monooxygenase gene) and *tetX1* (flavin-dependent monooxygenase gene)  
 275 [72-74].

276 We also identified in DCMSKEJBY0001B strain a putative IME without identified DR that  
 277 harbours CTn341. This conjugative transposon is typical of *B. fragilis* and carries the *tetQ* gene.  
 278 CTn341 (or CTn341-like) may also be found in other Bacteroidates, such as *Bacteroides sp.* PHL  
 279 2737, *B. xylanisolvens XB1A*, and *Phocaeicola vulgatus VIC01is*. Thus, CTn341 is apparently the  
 280 major disseminator of the *tetQ* gene within Bacteroidales (S4 Fig).

281

282 c) Conjugative Transposon

283 Among the conjugative transposons previously described in *Bacteroides* spp., we reported  
284 CTnDOT (aforementioned), CTn86, and CTn341.  
285 We have identified a CTn86-like (Accession no. AY372755.1) in thirteen ETBF strains (2-F-2#5,  
286 3397 N3, 078320-1, 1001285H\_161024\_D4, AM31-13AC, BFR\_KZ09, CL07T00C01,  
287 CL07T12C05, CL05T12C13, HMW 615, HMW 616, TL139C\_1B, and TL139C\_1B2). The *PER*  
288 gene, which encodes an ABC permease transporter protein, was excluded from these strains,  
289 possibly because of transposon insertion, as described by Franco [13]. CTn86 was also identified in  
290 20793-3, 86-5443-2-2, and BOB25 strains [13, 75-76].  
291 CTn341-like is in 20656-2-1, AF14-14AC, and AF14-26 strains. It does not have all CTn341 genes  
292 and attachment sites (*attL* and *attR*) [77]. It has genes for transfer (*traG*, *traI*, *traJ*, and *traM* genes),  
293 integration (*int* gene), mobilization (*mobA*, *mobB*, and *mobC*), and excision (*exc* gene) [78-80],  
294 besides *tetQ* (S5 Fig).

295

#### 296 c) Insertion Elements (IS)

297 ISBf5 (IS1182 family) is the insertion element most common in *B. fragilis* genomes. It has 1830 bp  
298 and carries one transposase gene [81].

299 ISBf1 (IS21 family) [82] is in some strains, but its *cepA* gene is incomplete in eight strains  
300 (885\_BFR, AD135F\_2B, AF32-10, Am47-7, COR2-248-WT-1, HCK-B3, HAP130N\_2B, TM08  
301 -15) and absent in AD135F\_1B, AD135F\_3B, ATCC 25285, and Ds-233 strains. However, they  
302 have in their genomes a *cepA* functional with the insertion of IS1224 in their promoter region that  
303 increases the *cepA* expression [82-83].

304 Functional resistance genes were identified in ISBthe1 (*nimB* gene, metronidazole), ISBf8 (*cfxA*  
305 gene), and IS4351 (*tetX* gene). ISBf8 and IS4351 are within the non-conjugative transposons  
306 (Tn4555 and Tn4351, respectively), and for that reason, they cannot spread their genes.

307 Therefore, the spread of genes for antibiotic resistance in *B. fragilis* depends on conjugative  
308 transposons, as suggested by Whittle et al. [84], Yan, Hall and Jiang [85], and Johnson and  
309 Grossman [23], and of ICE with T4SS, as we observed in our results. IS frequency and its genes for  
310 antimicrobial resistance are in Fig 3 and the genomic location of the insertion elements is shown in  
311 S6 Table.

312

313 **Fig 3. Comparison between two putative ICEs with T4SS from *Bacteroides fragilis***  
314 **DCMOUH0085B and *Butyricimonas faecalis* H184 genomes.** In (a) shown the conserved synteny

315 between these genomic regions; and b) indicates their features in DCMOUH0085B and H184.  
316 Antimicrobial resistance genes and their localization in the genomes are indicated in the figure.

317

### 318 3.5 Analysis of Molecular Evolution

#### 319 a) Molecular Evolution of Antibiotic Resistance Genes

320 Results indicated evidence of positive selection in the *cepA* (beta-lactamase gene) and *tetQ* genes.

321 Codon 88 of the *cepA* gene is under positive selection (FUBAR method; Posterior probability =

322 0.9878). The substitutions found do not contain any putative ribosome-binding sites indicated by

323 Rogers et al. [86].

324 *tetQ* alignment displayed 116 variable sites. FUBAR method inferred three codon sites under

325 positive selection: 35 (posterior probability = 0.9676), 237 (posterior probability = 0.9669), and 426

326 (posterior probability = 0.9623) while MEME suggested episodic positive selection at 354 codon

327 (p-value = 0.003), and 550 (p-value = 0.0464). Comparative analysis with the *tetQ* protein indicated

328 that the four GDP-GTP binding sites are intact, as described by Lépine et al. [65].

329

#### 330 b) Molecular Evolution in Pan-genome

331 At least 396 genes are under positive selection (episodic or pervasive). Most of them encode

332 membrane proteins, such as the adenosine triphosphate (atp)-binding cassette (abc) superfamily

333 (*macB* genes), resistance nodulation-division (*rnD*) family (*macA*, *mdtA*, *mdtE*, and *mexA* genes),

334 and tonb-dependent receptor (*susC* and *susD* genes).

335 ATP-binding and RND proteins are efflux pumps that facilitate the elimination of toxins and are

336 related to antimicrobial resistance phenotypes [87–90].

337 TonB-dependent receptors contribute to the transport and nutrient absorption [90]. Recently, they

338 have been the subject of research for developing vaccines against Gram-negative bacteria because

339 of their cell multiple functions [92–93].

340 Seven paralogous genes of the Colicin I receptor (*cirA* genes) also had several sites under positive

341 selection. These proteins belong to the TonB-dependent copper receptor family (IPR010100) and

342 perform the transport of nutrients across the periplasmic space [94–95]. Colicins in *Escherichia coli*

343 are toxins that act in intraspecific competition [96–97], but their role in *B. fragilis* is unclear.

344 Yoshizaki et al. [90] compared the genomes of 638R, NCTC9343, and YCH46 and found 52 genes

345 under positive selection. The greater diversity used in our work might explain the difference

346 between the results. The results of Hyphy are in S7 Table.

#### 347 **4. Conclusions**

348 HGT is an event of extreme evolutionary relevance for *B. fragilis*. The *tetQ* gene spread was mainly  
349 by ICE with T4SS and conjugative transposons, whereas the *cepA* gene was an ancient spread  
350 through a mobile element that lost its function. We can describe HGT events not yet reported in  
351 previous research. Nonetheless, greater availability of complete genomes is required for the  
352 verification and validation of these results. Besides antimicrobial resistance genes, other genes  
353 related to efflux pumps facilitating the exit of substances from the cells; transport and absorption of  
354 nutrients; and alternative carbon acquisition (DON PUL) might provide adaptive advantages for *B.*  
355 *fragilis*. There is no evidence that *EF-Tu*, *dnaK*, or colicin genes are associated with virulence and  
356 need further research to clarify their functions in *B. fragilis*.

357

#### 358 **Abbreviation:**

359 AMR: Antimicrobial multidrug resistance

360 BFT: Fragilysin

361 CRISPR: Clustered regularly interspaced short palindromic repeat

362 ETBF: Enterotoxigenic *Bacteroides fragilis*

363 HGT: Horizontal gene transfer

364 ICE: Integrative and conjugative elements

365 IME: Integrative mobilizable elements

366 NTBF: Non-enterotoxigenic *B. fragilis*

367

#### 368 **Supporting information**

369 **S1 Table. *Bacteroides fragilis* strains used in this study.**

370

371 **S2 Table. Pan-genome prediction of 183 *B. fragilis* strains.**

372

373 **S3 Table. Antibiotic resistance genes identified by CARD.**

374

375 **S4 Table. Results obtained by PhiSpy compared to the VFDB database.**

376

377 **S5 Table. Results obtained by ICEFinder compared to NCBI BLAST and CARD databases.**

378

379 **S6 Table. Results obtained by MobileElementFinder.**

380

381 **S7 Table. Results obtained by Hyphy software.**

382

383 **S1 Fig. Pan-genome prediction.**

384

385 **S2 Fig. COG distribution of genes found in the core, accessory and unique genomes.**

386 **S3 Fig. Pan-genome tree indicating the features of each strain.**

387

388 **S4 Fig. Comparison among the CTn341 from DCMSKEJBY0001B, *Phocaeicola vulgatus***

389 **VIC01, *Bacteroides sp.* PHL 2737, and *B. xylanisolvens* XB1A.**

390

391 **S5 Fig. Comparison among the CTn341 from AF14-14AC, AF14-26 and 20656-2-1 strains.**

392

## 393 **References**

394 [1] S. M. Finegold, "Overview of clinically important anaerobes", *Clin Microbiol Rev*, vol. 20, pp.  
395 205-207, 1995.

396

397 [2] J. L. Round and S. K. Mazmanian, "Inducible Foxp3 $\beta$  regulatory T-cell development by a  
398 commensal bacterium of the intestinal microbiota", *Proc Natl Acad Sci U S A*, vol. 107, pp. 12204-  
399 12209, 2010.

400

401 [3] D. Qu, F. Sun, S. Feng et al., "Protective effects of *Bacteroides fragilis* against  
402 lipopolysaccharide-induced systemic inflammation and their potential functional genes", *Food*  
403 *Funct*, vol. 12, pp. 1015-1025. 2022.

404

405 [4] C.L. Sears, “Enterotoxigenic *Bacteroides fragilis*: a Rogue among Symbiotes”, *Clin Microbiol*  
406 *Rev*, vol. 22, 349-69, 2009.

407

408 [5] H. W. Wexler, “*Bacteroides*: the Good, the Bad, and the Nitty-Gritty”, *Clin Microbiol Rev*, vol.  
409 20, pp. 593-621, 2007.

410

411 [6] N. Anka, T. V. Sydenhamb, L. H. Iversenc et al., “Characterisation of a multidrug-resistant  
412 *Bacteroides fragilis* isolate recovered from blood of a patient in Denmark using whole-genome  
413 sequencing”, *Int J Antimicrob Agents* vol. 46, pp. 117-120, 2015.

414

415 [7] J. Papaparaskevas, A. Katsandri, A. Pantazatou et al., “Epidemiological characteristics of  
416 infections caused by *Bacteroides*, *Prevotella* and *Fusobacterium* species: A prospective  
417 observational study”, *Anaerobe*, vol. 17, pp. 113-117, 2011.

418

419 [8] E. Valguarnera and J. B. Wardenburg, “Good gone bad: One toxin away from disease for  
420 *Bacteroides fragilis*”, *J Mol Biol*, vol. 432, pp. 765-785, 2020.

421

422 [9] H. Elsaghir and A. K. R. Reddivari (2021) *Bacteroides fragilis*,  
423 <https://www.ncbi.nlm.nih.gov/books/NBK553032/> (March 18, 2021)

424

425 [10] M. Vacante, R. Ciuni, F. Basile and A. Biondi, “Gut Microbiota and Colorectal Cancer  
426 Development: A Closer Look to the Adenoma-Carcinoma Sequence”, *Biomedicines*, vol. 8pp. 489,  
427 2020.

428

429 [11] W. T. Cheng, H. K. Kantilal and F. Davamani, “The Mechanism of *Bacteroides fragilis* toxin  
430 Contributes to Colon Cancer Formation”, *Malays J Med Sci*, vol. 27, pp. 9–21, 2020.

431

432 [12] J. S. Moncrief, A. J. Duncan, R. L. Wright et al., “Molecular characterization of the fragilysin  
433 pathogenicity islet of enterotoxigenic *Bacteroides fragilis*”, *Infect Immun*, vol. 66, pp. 1735-1739,  
434 1998.



- 435 [13] A. A. Franco, “The *Bacteroides fragilis* pathogenicity island is contained in a putative novel  
436 conjugative transposon”, *J Bacteriol*, vol. 186, pp. 6077-6092, 2004.  
437
- 438 [14] S. A. Shiryayev, A. E. Aleshin and N. Muranaka, “Structural and functional diversity of  
439 metalloproteinases encoded by the *Bacteroides fragilis* pathogenicity island”, *FEBS J*. vol. 281, pp.  
440 2487-2502, 2014.  
441
- 442 [15] J. Herrou, V. M. Choi, J. M. Wardenburg and S. Crosson, “Activation Mechanism of the  
443 *Bacteroides fragilis* Cysteine Peptidase, Fragipain”, *Biochemistry*, vol. 55, pp. 4077–4084, 2016.  
444
- 445 [16] G. Bamias and F. Cominelli, “Cytokines and intestinal inflammation”, *Curr Opin*  
446 *Gastroenterol*, vol. 32, pp. 437-442, 2016.  
447
- 448 [17] S. H. Ko, D. J. Rho, J. I. Jeon et al., “*Bacteroides fragilis* Enterotoxin Upregulates Heme  
449 Oxygenase-1 in Intestinal Epithelial Cells via a Mitogen-Activated Protein Kinase- and NF-  
450 kappaB-Dependent Pathway, Leading to Modulation of Apoptosis”, *Infect Immun*, vol. 84, pp.  
451 2541–2554, 2016.  
452
- 453 [18] A. A. Franco, L. M. Mundy, M. Trucksis et al., “Cloning and characterization of the  
454 *Bacteroides fragilis* metalloprotease toxin gene”, *Infect. Immun*, vol. 65, pp. 1007-1013, 1997.  
455
- 456 [19] N. Kato, C. X. Liu, H. Kato et al, “A new subtype of the metalloprotease toxin gene and the  
457 incidence of the three bft subtypes among *Bacteroides fragilis* isolates in Japan”, *FEMS Microbiol*  
458 *Lett*, vol. 182, pp; 171-176, 2000  
459
- 460 [20] C. L. Sears, “The toxins of *Bacteroides fragilis*”, *Toxicon*, vol. 39:1737-1746, 2001.  
461
- 462 [21] A. A. Franco, R. K. Cheng, A. Goodman and C. L. Sears CL, “Modulation of bft expression by  
463 the *Bacteroides fragilis* pathogenicity island and its flanking region”, *Mol Microbiol*, vol. 45, pp.  
464 1067-77, 2002.  
465

- 466 [22] S. Niestępski, M. Harnisz, E. Korzeniewska et al., “*Bacteroides spp.* - clinical significance,  
467 antibiotic resistance and identification methods”, *Postepy Mikrobiol*, vol. 56, pp. 67–76, 2017.  
468
- 469 [23] C. M. Johnson and A. D. Grossman, “Integrative and Conjugative Elements (ICEs): What  
470 They Do and How They Work”, *Annu Rev Genet*, vol. 49, pp. 577-601, 2015.  
471
- 472 [24] J. Guglielmini, L. Quintais, M. P. Garcillán-Barcia et al., “The repertoire of ICE in prokaryotes  
473 underscores the unity, diversity, and ubiquity of conjugation”, *PLoS Genet*, vol. 7, pp. e1002222,  
474 2011.  
475
- 476 [25] A. B. Russell, R. D. Hood, N. K. Bui et al., “Type VI secretion delivers bacteriolytic effectors  
477 to target cells”, *Nature*, vol. 475, pp. 343–347, 2011.  
478
- 479 [26] B. T. Ho, T. G. Dong and J. J. Mekalanos, “A view to a kill: the bacterial type VI secretion  
480 system”, *Cell Host Microbe*, vol. 15, pp. 9–21, 2014.  
481
- 482 [27] M. Chatzidaki-Livanis, N. Geva-Zatorsky and L. E. Comstock, “*Bacteroides fragilis* type VI  
483 secretion systems use novel effector and immunity proteins to antagonize human gut Bacteroidales  
484 species”, *Proc Natl Acad Sci U S A*, vol. 113, pp. 3627–3632, 2016.  
485
- 486 [28] R. A. Adegbola, “Bacterial adhesion and pathogenicity”, *Afr J Med Med Sci*, vol. 17, pp. 63-  
487 69, 1988.  
488
- 489 [29] A. B. Onderdonk, D. L. Kasper, R. L. Cisneros, et al., “The capsular polysaccharide of  
490 *Bacteroides fragilis* as a virulence factor: comparison of the pathogenic potential of encapsulated  
491 and unencapsulated strains”, *J Infect Dis*, vol. 136, pp. 82-89, 1977.  
492
- 493 [30] M. J. Coyne, A. O. Tzianabos, B. C. Mallory, et al., “Polysaccharide Biosynthesis Locus  
494 Required for Virulence of *Bacteroides fragilis*”, *Infect Immun*, vol. 69, pp. 4342–4350, 2001.  
495

- 496 [31] L. E. Comstock, M. J. Coyne, A. O. Tzianabos, et al., “Interstrain Variation of the  
497 Polysaccharide B Biosynthesis Locus of *Bacteroides fragilis*: Characterization of the Region from  
498 Strain 638R”, *J Bacteriol*, vol. 181, pp. 6192–6196, 1999.  
499
- 500 [32] L. K. Vestby, T. Grønseth, R. Simm et al., “Bacterial Biofilm and its Role in the Pathogenesis  
501 of Disease”, *Antibiotics*, vol. 2, pp. 59, 2020.  
502
- 503 [33] Y. Cao, E. R. Rocha and C. J. Smith, “Efficient utilization of complex N-linked glycans is a  
504 selective advantage for *Bacteroides fragilis* in extraintestinal infections”, *Proc Natl Acad Sci U S A*,  
505 vol. 111, pp. 12901–12906, 2014.  
506
- 507 [34] D. Sims, I. Sudbery, N. E. Ilott et al., “Sequencing depth and coverage: key considerations in  
508 genomic analyses”, *Nat Rev Genet*, vol. 15, pp. 121-132, 2014.  
509
- 510 [35] N. M. Chaudhari, V. K. Gupta and C. Dutta, “BPGA- an ultra-fast pan-genome analysis  
511 pipeline”, *Sci Rep*, vol. 6, pp. 24373, 2016.  
512
- 513 [36] R. C. Edgar, “MUSCLE: multiple sequence alignment with high accuracy and high  
514 throughput”, *Nucleic Acids Res*, vol. 32, pp. 1792–1797, 2004.  
515
- 516 [37] R. C. Edgar, R. C., “Search and clustering orders of magnitude faster than blast”,  
517 *Bioinformatics*, vol. 26, pp. 2460–2461, 2010.  
518
- 519 [38] T. Williams and C. Kelley (2018) Gnuplot 4.6.6, <http://www.gnuplot.info> (March, 18, 2021).  
520
- 521 [39] D. Couvin, A. Bernheim, C. Claire Toffano-Nioche et al., “CRISPRCasFinder, an update of  
522 CRISRFinder, includes a portable version, enhanced performance and integrates search for Cas  
523 proteins”, *Nucleic Acids Res*, vol. 46, pp. W246–W251, 2018.  
524

- 525 [40] B. Jia, A. Raphenya, B. Alcock et al., “CARD 2017: expansion and model-centric curation of  
526 the comprehensive antibiotic resistance database”, *Nucleic Acids Res*, vol. 45, pp. D566-D573,  
527 2017.
- 528
- 529 [41] S. Akhter, R. K. Aziz and R.A. Edwards, “PhiSpy: a novel algorithm for finding prophages in  
530 bacterial genomes that combines similarity- and composition-based strategies”, *Nucleic Acids Res*,  
531 vol. 40, pp. e126, 2012.
- 532
- 533 [42] M. Liu, X. Li, Y. Xie et al., “ICEberg 2.0: an updated database of bacterial integrative and  
534 conjugative elements”, *Nucleic Acids Res*, vol. 47, pp. D660–D665, 2019.
- 535
- 536 [43] B. P. Alcock, A. R. Raphenya, T. T. Y. Lau et al., “CARD 2020: Antibiotic Resistome  
537 Surveillance with the Comprehensive Antibiotic Resistance Database”, *Nucleic Acids Res*, vol. 48,  
538 pp. D517-D525, 2020.
- 539
- 540 [44] L. Chen, J. Yang, J. Yu J et al., “VFDB: a reference database for bacterial virulence factors”,  
541 *Nucleic Acids Res*, vol. 33, pp. D325-8, 2005.
- 542
- 543 [45] S. Altschul, T. L. Madden, A. A. Schäffer et al., “Gapped BLAST and PSI-BLAST: A new  
544 generation of protein database search programs”, *Nucleic Acids Res*, vol. 25, pp. 3389–3402, 1997.
- 545
- 546 [46] W. R. Pearson, “An introduction to sequence similarity ("homology") searching”, *Curr Protoc*  
547 *Bioinform*, vol. 3, pp. 3.1, 2013.
- 548
- 549 [47] A. E. Darling, B. Mau, F. R. Blattner et al., “Mauve: multiple alignment of conserved genomic  
550 sequence with rearrangements”, *Genome Res*, vol. 14, pp. 1394–1403, 2004.
- 551
- 552 [48] A. E. Darling, B. Mau and N. T Perna, “ProgressiveMauve: multiple genome alignment with  
553 gene gain, loss and rearrangement”, *PLoS One*, vol. 5, pp. e11147, 2010.
- 554

- 555 [49] M. H. K. Johansson, V. Bortolaia, S. Tansirichaiya et al., “Detection of mobile genetic  
556 elements associated with antibiotic resistance in *Salmonella enterica* using a newly developed web  
557 tool: MobileElementFinder”, *J Antimicrob Chemother*, vol. 76, pp. 101–109, 2021.  
558
- 559 [50] S. Guindon, J. F. Dufayard and V. Lefort et al., “New Algorithms and Methods to Estimate  
560 Maximum-Likelihood Phylogenies: Assessing the Performance of PhyML 3.0”, *Syst Biol*, vol. 59,  
561 pp. 307-321, 2010.  
562
- 563 [51] S. L. Kosakovsky Pond, D. Posada, M. B. Gravenor et al., “Automated Phylogenetic Detection  
564 of Recombination Using a Genetic Algorithm”, *Mol Biol Evol*, vol. 23, pp. 1891-1901, 2006.  
565
- 566 [52] S. L. Kosakovsky Pond and S. D. W. Frost, “Not So Different After All: A Comparison of  
567 Methods for Detecting Amino Acid Sites Under Selection”, *Mol Biol Evol*, vol. 22, pp. 1208-1222,  
568 2005.  
569
- 570 [53] B. Murrell, S. Moola, A. Mabona et al., “FUBAR: a fast, unconstrained bayesian  
571 approximation for inferring selection”, *Mol Biol Evol*, vol. 30, pp. 1196-1205, 2013.  
572
- 573 [54] S. L. Kosakovsky Pond, A. F. Y. Poon, R. Velazquez et al., “HyPhy 2.5—A Customizable  
574 Platform for Evolutionary Hypothesis Testing Using Phylogenies”, *Mol Biol Evol*, vol. 37, pp. 295-  
575 299, 2020.  
576
- 577 [55] B. Murrell, J. O. Wertheim, S. Moola et al., “Detecting Individual Sites Subject to Episodic  
578 Diversifying Selection”, *PLoS Genetics*, vol. 8, pp. e1002764, 2012.  
579
- 580 [56] B. Murrell, S. Weaver, M. D. Smith et al., “Gene-Wide Identification of Episodic Selection”,  
581 *Mol Biol Evol*, vol. 32, pp. 1365-1371, 2015.  
582
- 583 [57] Y. Zou, W. Xue, G. Luo et al. “1,520 reference genomes from cultivated human gut bacteria  
584 enable functional microbiome analyses”, *Nat Biotechnol*, vol. 37, pp. 179–185, 2019.  
585

- 586 [58] T. Tomoyasu, A. Tabata, H. Imaki et al., “Role of *Streptococcus intermedius* DnaK chaperone  
587 system in stress tolerance and pathogenicity”, *Cell Stress Chaperon*, vol. 17, pp. 41–55, 2011.  
588
- 589 [59] V. K. Singh, S. Utaida, L. S. Jackson et al., “Role for *dnaK* locus in tolerance of multiple  
590 stresses in *Staphylococcus aureus*”, *Microbiology*, vol. 153, pp. 3162–3173, 2007.  
591
- 592 [61] K. R. Fourie and H L. Wilson, “Understanding GroEL and DnaK Stress Response Proteins as  
593 Antigens for Bacterial Diseases”, *Vaccines*, vol. 8, pp. 773, 2020.  
594
- 595 [62] Science, U.o.M.S.o.M.I.f.G. (2013). GSCID Genomic Sequencing Center for Infectious  
596 Disease [Online]. NCBI. Available online at: [http://gscid.igs.umaryland.edu/wp.php?](http://gscid.igs.umaryland.edu/wp.php?wp=comparative_genomics_of_human_mucosal_isolates_of_the_enterotoxigenic_bacteroides_fragilis_group)  
597 [wp=comparative\\_genomics\\_of\\_human\\_mucosal\\_isolates\\_of\\_the\\_enterotoxigenic\\_bacteroides\\_frag](http://gscid.igs.umaryland.edu/wp.php?wp=comparative_genomics_of_human_mucosal_isolates_of_the_enterotoxigenic_bacteroides_fragilis_group)  
598 [ilis\\_group](http://gscid.igs.umaryland.edu/wp.php?wp=comparative_genomics_of_human_mucosal_isolates_of_the_enterotoxigenic_bacteroides_fragilis_group).  
599
- 600 [63] M. Chatzidaki-Livanis, M. J. Coyne and L. E. Comstock, “An antimicrobial protein of the gut  
601 symbiont *Bacteroides fragilis* with a MACPF domain of host immune proteins”, *Mol Microbiol*,  
602 vol. 94, pp. 1361–1374, 2014.  
603
- 604 [64] Q. Xu, P. Abdubek, T. Astakhova et al., “Structure of a membrane-attack complex/perforin  
605 (MACPF) family protein from the human gut symbiont *Bacteroides thetaiotaomicron*”, *Acta*  
606 *Crystallogr Sect F Struct Biol Cryst Commun*, vol. 66, pp. 1297-305, 2010.  
607
- 608 [63] S. Valdezate, F. Cobo, S. M. et al., “Genomic Background and Phylogeny of *cfiA*-Positive  
609 *Bacteroides fragilis* Strains Resistant to Meropenem-EDTA”, *Antibiotics (Basel)*, vol. 10, pp. 304,  
610 2021.  
611
- 612 [64] M. Tajkarimi and H. W. Wexler, “CRISPR-Cas Systems in *Bacteroides fragilis*, an Important  
613 Pathobiont in the Human Gut Microbiome”, *Front Microbiol*, vol. 23, pp. 2234, 2017.  
614
- 615 [65] G. Lépine, J. M. Lacroix and C.G Walker, “A Progulske-Fox. Sequencing of a *tet(Q)* gene  
616 isolated from *Bacteroides fragilis* 1126”, *Antimicrob Agents Chemother*, 37:2037-2041, 2013.

- 617 [66] Y. Hu, X. Yang, J. Qin et al., “Metagenome-wide analysis of antibiotic resistance genes in a  
618 large cohort of human gut microbiota”, *Nat Commun*, vol. 4, pp. 2151, 2013.
- 619
- 620 [67] M. C. Halula, S. Manning and F. L. Macrina, “Nucleotide sequence of *ermFU*, a macrolide-  
621 lincosamide-streptogramin (MLS) resistance gene encoding an RNA methylase from the conjugal  
622 element of *Bacteroides fragilis* V503”, *Nucleic Acids Res*, vol. 19, pp. 3453, 1991.
- 623
- 624 [68] E. K. Park, H. Kim and H. J. Jin, “Phylogenetic analysis of rRNA methyltransferases, Erm and  
625 KsgA, as related to antibiotic resistance”, *FEMS Microbiol Lett*, vol. 309, pp. 151–162, 2010.
- 626
- 627 [69] K. L. Harvey, V. M. Jarocki, I. G. Charles et al., “The Diverse Functional Roles of Elongation  
628 Factor Tu (EF-Tu) in Microbial Pathogenesis”, *Front Microbiol*, vol. 10:2351, 2019.
- 629
- 630 [70] M. J. Coyne, N. L. Zitomersky, A. M. McGuire et al., “Evidence of Extensive DNA Transfer  
631 between Bacteroidales Species within the Human Gut”, *mBio*, vol. 5, pp. e01305-14, 2014.
- 632
- 633 [71] L. García-Bayona, M. J. Coyne and L. E. Comstock, “Mobile Type VI secretion system loci of  
634 the gut Bacteroidales display extensive intra-ecosystem transfer, multi-species spread and  
635 geographical clustering”, *PLoS Genet*, vol. 17, pp. e1009541, 2021.
- 636
- 637 [72] G. Whittle, B. D. Hund, N. B. Shoemaker et al., “Characterization of the 13-kilobase *ermF*  
638 region of the *Bacteroides* conjugative transposon CtnDOT”, *Appl Environ Microbiol*, vol. 67, pp.  
639 3488-95, 2001.
- 640
- 641 [73] N. B. Shoemaker, R. D. Barber and A. A. Salyers, “Cloning and characterization of a  
642 *Bacteroides* conjugal tetracycline-erythromycin resistance element by using a shuttle cosmid  
643 vector”, *J Bacteriol*, vol. 171, pp. 1294–1302, 1989.
- 644
- 645 [74] F. Delavat, R. Miyazaki, N. Carraro et al., “The hidden life of integrative and conjugative  
646 elements”, *FEMS Microbiology Reviews*, vol. 41, pp. 512–537, 2017.
- 647

- 648 [75] J. V. Pierce and H. D. Bernstein, “Genomic Diversity of Enterotoxigenic Strains of  
649 *Bacteroides fragilis*”, PLoS One, vol. 11, pp. e0158171, 2016.  
650
- 651 [76] A. S. Nikitina, D. D. Kharlampieva, V. V. Babenko et al., “Complete Genome Sequence of an  
652 Enterotoxigenic *Bacteroides fragilis* Clinical Isolate”, *Genome Announc*, vol. 3, pp. e00450-15,  
653 2015.  
654
- 655 [77] G. Guédon, V. Libante, C. Coluzzi et al., “The Obscure World of Integrative and Mobilizable  
656 Elements, Highly Widespread Elements that Pirate Bacterial Conjugative Systems”, *Genes (Basel)* ,  
657 vol. 8, pp. 337, 2017.  
658
- 659 [78] G. T. Bonheyo, B. D. Hund, N. B. Shoemaker et al., “Transfer region of a *Bacteroides*  
660 conjugative transposon contains regulatory as well as structural genes”, *Plasmid*, vol. 46, pp. 202–  
661 209, 2001.  
662
- 663 [79] N. García, G. Gutiérrez, M. Lorenzo et al., “Gene Context and DNA rearrangements in the  
664 carbapenemase locus of division II strains of *Bacteroides fragilis*”, *Antimicrob Agents Chemother*,  
665 vol. 53, pp. 2677-8, 2009.  
666
- 667 [80] A. Haggoud, G. Reysset, H. Azeddoug et al., “Nucleotide sequence analysis of two 5-  
668 nitroimidazole resistance determinants from *Bacteroides* strains and of a new insertion sequence  
669 upstream of the two genes”, *Antimicrob Agents Chemother*, vol. 38, pp. 1047-51, 1994.  
670
- 671 [81] T. Kuwahara, A. Yamashita, H. Hirakawa et al., “Genomic analysis of *Bacteroides fragilis*  
672 reveals extensive DNA inversions regulating cell surface adaptation”, *Proc Natl Acad Sci U S A*,,  
673 vol. 101, pp. 14919-14924, 2004.  
674
- 675 [82] M. B. Rogers, T. K. Bennett, C. M. Payne et al., “Insertional activation of *CEPA* leads to high-  
676 level beta-lactamase expression in *Bacteroides fragilis* clinical isolates”, *J Bacteriol*, vol. 176, pp.  
677 4376–4384, 1994.  
678



- 679 [83] J. Vandecraen, M. Chandler, A. Aertsen et al., “The impact of insertion sequences on bacterial  
680 genome plasticity and adaptability”, *Crit Rev Microbiol*, vol. 43, pp. 709-730, 2017.  
681
- 682 [84] G. Whittle, N. B. Shoemaker and A. A. Salyers, “The role of *Bacteroides* conjugative  
683 transposons in the dissemination of antibiotic resistance genes”, *Cell Mol Life Sci*, vol. 59, pp.  
684 2044-54, 2002.  
685
- 686 [85] W. Yan, A. B. Hall and X. Jiang X, "Bacteroidales species in the human gut are a reservoir of  
687 antibiotic resistance genes regulated by invertible promoters", *npj Biofilms Microbiomes*, vol. 8,  
688 2022.  
689
- 690 [86] M. B. Rogers, A. C. Parker, C. J. Smith, “Cloning and characterization of the endogenous  
691 cephalosporinase gene, *CEPA*, from *Bacteroides fragilis* reveals a new subgroup of Ambler class A  
692 beta-lactamases”, *Antimicrob Agents Chemother*, vol. 37, pp. 2391-400, 1993.  
693
- 694 [87] X. Z. Li and H. Nikaido, “Efflux-mediated drug resistance in bacteria”, *Drugs*, vol. 64, pp.  
695 159-204, 2004.  
696
- 697 [88] A. L. Pimenta, K. Racher, L. Jamieson et al., Mutations in *HlyD*, part of the type 1 translocator  
698 for hemolysin secretion, affect the folding of the secreted toxin, *J. Bacteriol*, vol. 187, pp. 7471-80,  
699 2005.  
700
- 701 [89] L. J. Piddock, “Multidrug-resistance efflux pumps - not just for resistance”, *Nat Rev*  
702 *Microbiol*, vol. 4, pp. 629-36, 2006.  
703
- 704 [90] A. L. Davidson, E. Dassa, C. Orelle et al., “Structure, function, and evolution of bacterial ATP-  
705 binding cassette systems”, *Microbiol Mol Biol Rev*, vol. 72, pp. 317-364, 2008.  
706
- 707 [91] S. Yoshizaki, T. Umemura, K. Tanaka et al., “Genome-wide evidence of positive selection in  
708 *Bacteroides fragilis*”, *Computational Biology and Chemistry*, vol. 52, pp. 43-50, 2014.  
709

710 [92] J. Wang J, K. Xiong, Q. Pan et al., Application of TonB-Dependent Transporters in Vaccine  
711 Development of Gram-Negative Bacteria”, *Front Cell Infect Microbiol*, vol. 10, pp. 589115, 2021.

712

713 [93] E. B. Bettin, J. Dorneles, A. S. Hecktheuer et al., “TonB-dependent receptor epitopes  
714 expressed in *M. bovis* BCG induced significant protection in the hamster model of leptospirosis”,  
715 *Appl Microbiol Biotechnol*, vol. 106, pp. 173-184, 2022.

716

717 [94] D. P. Chimento, A. K. Mohanty, R. J. Kadner et al., “Substrate-induced transmembrane  
718 signaling in the cobalamin transporter Btu”, *Nat Struct Biol*, vol. 10, pp. 394-401, 2003.

719

720 [95] A. R. Reeves, J. N. D'Elia, J. Frias et al., “A *Bacteroides thetaiotaomicron* outer membrane  
721 protein that is essential for utilization of maltooligosaccharides and starch”, *J. Bacteriol*, vol. 178,  
722 pp. 823-30, 1996.

723

724 [96] E. Cascales, S. K. Buchanan, D. Duché et al., “Colicin biology”, *Microbiol Mol Biol Rev*, vol.  
725 71, pp. 158–229, 2007.

726

727 [97] F. Calcuttawala, A. Pal, P. Nath et al., “Structural and functional insights into colicin: a new  
728 paradigm in drug discovery”, *Arch Microbiol*, vol. 20, pp. 37, 2021.

729

730

731

732

733

734

735

736

737

738

739

740
